# Supplementary material
Source: publisher site journal article supplement (https://www.dovepress.com/article/377463)
Supplement: Supplementary file 1 [file get_supplementary_file.php]

Supplementary Table 1. Patients’ clinical and laboratory characteristics

| Variable | N (%) |
| --- | --- |
| Smoking Status | |
| Never smoked | 575 (66.1) |
| Former smoker | 125 (14.4) |
| Current smoker | 170 (19.5) |
| Pack-year, m ± SD | 45.62 ± 45.90 |
| Medications | |
| ACE inhibitors | 213 (24.5) |
| ARBs | 289 (33.2) |
| CCBs | 274 (31.5) |
| Thiazide diuretics | 376 (43.2) |
| Beta-blockers | 441 (50.7) |
| Aspirin | 412 (47.4) |
| Diabetes Complications | |
| Retinopathy | 151 (17.4) |
| PVD | 54 (6.2) |
| Peripheral Neuropathy | 58 (6.7) |
| Nephropathy | 206 (23.7) |
| Microalbuminuria | 157 (18.0) |
| Macroalbuminuria | 49 (5.6) |
| Oral Hypoglycemic Medications | |
| Metformin | 688 (79.1) |
| Sulfonylureas | 338 (38.9) |
| DPP-4 inhibitors | 111 (12.8) |
| TZD | 3 (0.3) |
| GLP-1 receptor agonists | 2 (0.2) |
| Insulin | 474 (54.5) |
| Kidny Laboratory Findings | |
| S.Cr. (mg/dl), m±SD | 1.13 ± 0.95 |
| Elevated S. Cr (≥1.4 mg/dl) | 132 (15.2) |
| BUN, m ± SD | 7.15 ± 6.24 |
| Urine Albumin : Creatinine ratio (mg/mmol) | 26.98 ± 76.59 |

Abbreviations: N: number; CKD: chronic kidney disease; ACE inhibitors: Angiotensin-converting enzyme inhibitors; ARBs: Angiotensin II receptor blockers; CCBs: Calcium channel blockers; PVD: Peripheral vascular disease; DPP-4 inhibitors: Dipeptidyl peptidase-4 inhibitors; TZD: Thiazolidinediones; GLP-1 receptor agonists: Glucagon-Like Peptide 1 receptor agonists; m ± SD: mean ± standard deviation

Supplementary Table 2. Univariate analysis of medications with dyslipidemia patterns among patients with type 2 diabetes

|  | Low HDL-C  M<40; F<50 mg/dl  n (%) | High LDL-C  ≥ 100 mg/dl  n (%) | Hypercholesterolemia  ≥ 200 mg/dl  n (%) | Hypertriglyceridemia  ≥ 150 mg/dl  n (%) | Dyslipidemia  ≥ 1 abnormality  n (%) | High TC/HDL ratio  ≥ 5  n (%) |
| --- | --- | --- | --- | --- | --- | --- |
| Overall | 576 (66.2) | 540 (62.1) | 250 (28.7) | 506 (58.2) | 795 (91.4) | 289 (33.2) |
| Lipid-Lowering Medications | | | | | | |
| Statins | | | | | | |
| Yes | 377 (63.1) | 315 (52.8) | 121 (20.3) | 336 (56.3) | 524 (87.8) | 168 (28.1) |
| No | 199 (72.9) | 225 (82.4) | 129 (47.3) | 170 (62.3) | 271 (99.3) | 121 (44.3) |
| *p-value* | *0.005* | *˂0.001* | *˂0.001* | *0.096* | *˂0.001* | *˂0.001* |
| Fibrates | | | | | | |
| Yes | 14 (31.8) | 24 (54.5) | 16 (36.4) | 16 (36.4) | 34 (77.3) | 9 (20.5) |
| No | 562 (68.0) | 516 (62.5) | 234 (28.3) | 490 (59.3) | 761 (92.1) | 280 (33.9) |
| *p-value* | *˂0.001* | *0.291* | *0.251* | *0.003* | *0.001* | *0.065* |
| Anti-Diabetic Medications | | | | | | |
| Metformin | | | | | | |
| Yes | 443 (64.4) | 438 (63.7) | 200 (29.1) | 400 (58.1) | 627 (91.1) | 223 (32.4) |
| No | 133 (73.1) | 102 (56.0) | 50 (27.5) | 106 (58.2) | 168 (92.3) | 66 (36.3) |
| *p-value* | *0.028* | *0.060* | *0.672* | *0.980* | *0.616* | *0.327* |
| Sulfonylureas | | | | | | |
| Yes | 237 (70.1) | 212 (62.7) | 96 (28.4) | 193 (57.1) | 311 (92.0) | 112 (33.1) |
| No | 339 (63.7) | 328 (61.7) | 154 (28.9) | 313 (58.8) | 484 (91.0) | 177 (33.3) |
| *p-value* | *0.052* | *0.752* | *0.863* | *0.613* | *0.596* | *0.967* |
| Dipeptidyl Peptidase-4 (DPP-4) Inhibitors | | | | | | |
| Yes | 73 (65.8) | 73 (65.8) | 37 (33.3) | 63 (56.8) | 103 (92.8) | 36 (32.4) |
| No | 503 (66.3) | 467 (61.5) | 213 (28.1) | 443 (58.4) | 692 (91.2) | 253 (33.3) |
| *p-value* | *0.916* | *0.390* | *0.252* | *0.748* | *0.570* | *0.851* |
| Insulin | | | | | | |
| Yes | 327 (69.0) | 280 (59.1) | 131 (27.6) | 284 (59.9) | 431 (90.9) | 161 (34.0) |
| No | 249 (62.9) | 260 (65.7) | 119 (30.1) | 222 (56.1) | 364 (91.9) | 128 (32.3) |
| *p-value* | *0.058* | *0.056* | *0.433* | *0.251* | *0.604* | *0.608* |

Abbreviations: n: number; HDL-C: High-density lipoprotein-cholesterol; LDL-C: Low-density lipoprotein-cholesterol

Supplementary Table 3. Multivariate analysis of factors associated with low HDL, high LDL, hypercholesterolemia, and hypertriglyceridemia patients with type 2 diabetes.

| Variable | Adjusted Odds Ratio | 95% Confidence Interval | *p*-value |
| --- | --- | --- | --- |
| Low high-density lipoprotein-cholesterol (Low HDL-C) | | | |
| Peripheral Vascular Disease | 2.666 | 1.083 – 6.559 | 0.033 |
| Statins (Not taking) | 2.174 | 1.428 – 3.311 | <0.001 |
| Fibrates (Not taking) | 4.460 | 2.082 – 9.556 | <0.001 |
| Metformin (Not taking) | 1.518 | 0.941 – 2.449 | 0.087 |
| Sulfonylureas (Not taking) | 0.755 | 0.522 – 1.093 | 0.137 |
| Use of Beta-blockers | 2.007 | 1.343 – 2.997 | 0.001 |
| High low-density lipoprotein-cholesterol (High LDL-C) | | | |
| Age groups (years) | | | |
| 30-39 | 18.787 | 3.343 – 105.570 | 0.001 |
| 40-49 | 19.967 | 4.854 – 82.137 | <0.001 |
| 50-59 | 7.383 | 2.105 – 25.900 | 0.002 |
| 60-69 | 4.394 | 1.286 – 15.017 | 0.018 |
| 70-79 | 2.998 | 0.861 – 10.447 | 0.085 |
| ≥80 | REF | REF | REF |
| Diabetic Retinopathy | 1.715 | 1.000 – 2.939 | 0.050 |
| Peripheral Vascular Disease | 2.608 | 1.009 – 6.737 | 0.048 |
| Statins (Not taking) | 5.348 | 3.324 – 8.604 | <0.001 |
| Insulin (Not taking) | 2.590 | 1.670 – 4.017 | <0.001 |
| Use of Beta-blockers | 1.878 | 1.205 – 2.927 | 0.005 |
| Hypercholesterolemia | | | |
| Age groups (years) | | | |
| 30-39 | 3.080 | 0.554 – 17.114 | *0.199* |
| 40-49 | 3.822 | 0.952 – 15.348 | *0.059* |
| 50-59 | 1.584 | 0.433 – 5.792 | *0.487* |
| 60-69 | 1.123 | 0.308 – 4.095 | *0.860* |
| 70-79 | 0.625 | 0.164 – 2.381 | *0.491* |
| ≥80 | REF | REF | *REF* |
| Peripheral Vascular Disease | 1.702 | 0.788 – 3.676 | 0.176 |
| Peripheral Neuropathy | 1.929 | 0.945 – 3.939 | 0.071 |
| Statins (Not taking) | 5.278 | 3.323 – 8.385 | <0.001 |
| Fibrates (Not taking) | 0.572 | 0.258 – 1.271 | 0.170 |
| Sulfonylureas (Not taking) | 1.450 | 0.947 – 2.220 | 0.088 |
| Insulin (Not taking) | 2.066 | 1.315 – 3.247 | 0.002 |
| Use of Beta-blockers | 1.570 | 1.003 – 2.460 | 0.049 |
| Hypertriglyceridemia | | | |
| Age groups (years) | | | |
| 30-39 | 2.254 | 0.536 – 9.484 | *0.268* |
| 40-49 | 3.107 | 0.954 – 10.120 | *0.060* |
| 50-59 | 1.635 | 0.572 – 4.674 | *0.359* |
| 60-69 | 1.181 | 0.420 – 3.319 | *0.752* |
| 70-79 | 1.241 | 0.432 – 3.567 | *0.689* |
| ≥80 | REF | REF | *REF* |
| Diabetic Retinopathy | 1.502 | 0.928 – 2.432 | 0.098 |
| Peripheral Vascular Disease | 1.863 | 0.825 – 4.204 | 0.134 |
| Peripheral Neuropathy | 2.153 | 1.024 – 4.528 | 0.043 |
| Fibrates (Not taking) | 2.252 | 1.062 – 4.776 | 0.034 |
| Dipeptidyl Peptidase-4 Inhibitors | 1.540 | 0.902 – 2.632 | 0.114 |
| Use of Beta-blockers | 2.095 | 1.440 – 3.046 | <0.001 |
